# Nec12 regulates epidermal adhesion and wound repair

Adam Giangreco<sup>1,\*</sup>, Kim B. Jensen<sup>2</sup>, Yoshimi Takai<sup>3</sup>, Jun Miyoshi<sup>4</sup> and Fiona M. Watt<sup>1,2,\*</sup>

Differential expression of cell adhesion molecules regulates stem cell location, self-renewal and lineage selection under steady state conditions and during tissue repair. We show that the intercellular adhesion protein nectin-like molecule 2 (Nec12) is highly expressed in bulge stem cells of adult human and mouse hair follicles. Overexpression of Nec12 in cultured human keratinocytes led to upregulation of calcium/calmodulin-associated Ser/Thr kinase (CASK), increased calcium-independent intercellular adhesion, and inhibition of cell motility and in vitro wound healing. Although the rate of cell proliferation was reduced, terminal differentiation was unaffected. To assess the role of Nec12 in vivo, we examined the epidermis of *Nec12*-null mice and developed transgenic mice that expressed Nec12 in the basal layer of murine epidermis. Nec12 overexpression led to a reduction in S-phase cells and an increase in quiescent cells retaining DNA label in the bulge. Although epidermal homeostasis appeared normal in both transgenic and knockout mice, wound healing was markedly delayed. Nec12 overexpression resulted in reduced proliferation and increased levels of CASK and E-cadherin at the leading edge of healing wounds, consistent with its effects in culture. Our results demonstrate that Nec12 is involved in regulating epidermal stem cell quiescence and location.

**KEY WORDS:** Epidermis, Intercellular adhesion, Stem cell, Wound healing

## INTRODUCTION

Stem cells with the capacity to generate all epidermal lineages have been identified in hair follicles, sebaceous glands and the interfollicular epidermis (IFE) (Fuchs, 2007; Watt et al., 2006). These cells have unique adhesive characteristics that distinguish them from their more differentiated progeny, including increased extracellular matrix (ECM) adhesion and cell-cell cohesion (Estrach et al., 2007; Fuchs et al., 1997; Halbleib and Nelson, 2006; Molès and Watt, 1997; Watt, 2002). As in other tissues, epidermal cell adhesion molecules, including integrins and cadherins, influence both intrinsic cellular signalling and the interaction of stem cells with their surrounding environment (Watt, 2002). Perturbation of integrin-mediated ECM adhesion or cadherin-mediated intercellular adhesion results in a range of epidermal abnormalities, including transient skin hyperplasia, abnormal wound healing, tissue thinning and loss of hair follicles (Brakebusch et al., 2000; Grose et al., 2002; Jamora et al., 2003; Lopez-Róvira et al., 2005; Perez-Moreno et al., 2003; Tinkle et al., 2004; Young et al., 2003). In some cases these changes are associated with depletion of the epidermal stem cell compartment (e.g. Benitah et al., 2005).

In recent years, several microarray studies have been performed on the hair follicle stem cell compartment known as the bulge. These have identified a range of bulge markers that are involved in cell adhesion, including nectin-like molecule 2 (Nec12; also known as Igsf4, RA175, SgIGSF, TSLC1, SynCAM1 and CADM1) (Morris et al., 2004; Ohyama et al., 2006; Tumber et al., 2004). Nec12 belongs to the family of nectins and nectin-like (Nec1) molecules, which are intercellular adhesion molecules characterised by their

calcium insensitivity and immunoglobulin (Ig)-like extracellular binding domains (Takai et al., 2008). Mutations in the gene encoding nectin-1 (*PVRL1* for poliovirus receptor-like 1) cause the autosomal recessive form of cleft lip/palate ectodermal dysplasia [CLPED1 (Suzuki et al., 2000)], and *Pvr11*-knockout mice exhibit abnormal epidermal differentiation (Wakamatsu et al., 2007).

Studies in various tissues and cell types indicate that Nec12 expression influences epithelial cell scattering, proliferation and differentiation (Ito et al., 2007; Ito et al., 2003; Mao et al., 2003; Masuda et al., 2005; Shingai et al., 2003). Nec12 mediates homotypic intercellular adhesion and heterotypic adhesion via nectin-3, Nec11 and class I-restricted T-cell-associated molecule (CRTAM) (Galibert et al., 2005; Takai et al., 2008). Nec12 has been shown to enhance E-cadherin-dependent adherens junction stability and directly interact with actin-binding proteins to regulate cytoskeletal organisation and Rho GTPase activity (Masuda et al., 2005). The cytoplasmic PDZ domain of Nec12 binds membrane-associated guanylate kinase (MAGuK) proteins including CASK, MPP3, Pals2 and syntenin (Takai et al., 2008). These interactions form a molecular scaffold that affects actin cytoskeletal organisation and cell polarity.

In this report, we have examined the expression and function of Nec12 in mammalian epidermis. We show that Nec12 is highly expressed in bulge stem cells and influences epidermal adhesion, proliferation and wound healing. Our results provide evidence for a novel link between cell adhesion, stem cell quiescence and tissue repair.

## MATERIALS AND METHODS

### Sample preparation and immunostaining

Frozen tissue sections were prepared using OCT and fixed in 1% paraformaldehyde before staining. Sections of paraffin-embedded tissues were prepared using standard conditions. Human skin was obtained in accordance with the Human Tissue Act with appropriate ethical approval. Mouse tail epidermal whole-mounts were prepared as previously described (Braun et al., 2003).

Antibody staining followed standard conditions (block staining in 5% serum, 0.2% Tween-20 and 0.2% fish skin gelatin). Antibodies were sourced as follows: rat anti-Nec12 (developed by Y.T.), chicken anti-Nec12 (MBL), rabbit anti-keratin-14 (ABR Biosystems) mouse anti-keratin-14

<sup>1</sup>Cancer Research UK Cambridge Research Institute, Li Ka Shing Centre, Robinson Way, Cambridge CB2 0RE, UK. <sup>2</sup>Wellcome Trust Centre for Stem Cell Research, Tennis Court Road, Cambridge CB2 1QR, UK. <sup>3</sup>Department of Biochemistry and Molecular Biology, Kobe University Graduate School of Medicine, Kobe 650-0017, Japan. <sup>4</sup>Department of Molecular Biology, Osaka Medical Centre for Cancer and Cardiovascular Diseases, Osaka 537-8511, Japan.

\*Present address: Centre for Respiratory Research, Department of Medicine, University College London, 5 University Street, London WC1E 6JJ, UK

†Author for correspondence (Fiona.watt@cancer.org.uk)

[LL002 (Jensen and Watt, 2006)], rat anti-CD34 (BD Biosciences), rabbit anti-Ki67 (Novocastra), rat anti-FLAG (Sigma), mouse anti-involucrin [SY5 (Sevilla et al., 2008)], rat anti- $\alpha 6$  integrin (BD Pharmingen), mouse anti-E-cadherin (Invitrogen), mouse anti-keratin-15 [LHK15 (Braun et al., 2003)], sheep anti-BrdU (Abcam), rabbit anti-keratin-6 (Covance). Species-specific secondary antibodies conjugated to Alexa Fluor 488, 555 or 633 were purchased from Molecular Probes. Images were acquired using a Leica TCS Tandem confocal with  $\times 10$  or  $\times 20$  objectives. E-cadherin levels at cell-cell borders were quantified as described previously (Sevilla et al., 2008).

#### Keratinocyte culture and retroviral transduction

Primary human neonatal foreskin epidermal keratinocytes were isolated and cultured on a J2 3T3 feeder layer in FAD medium supplemented with 10% FCS and HICE cocktail, as described previously (Jensen and Watt, 2006). To determine colony-forming efficiency, cells were seeded at 100–500 cells per 60 mm dish and cultured for 14 days before fixation and staining (Jensen and Watt, 2006). Colony-forming efficiency was determined as described previously (Jensen and Watt, 2006). The area of individual colonies was measured using Velocity software.

Keratinocyte growth rate assays were performed using a CellTiter 96 AQ kit (Promega) according to the manufacturer's instructions. When cells were grown under low-calcium conditions, they were seeded without feeders in

complete KSFM (Invitrogen); to raise the level of  $\text{Ca}^{2+}$ , the medium was changed to complete FAD 2 hours before fixation. Keratinocytes were cultured on de-epidermised dermis (DED) for 14 days at the air-medium interface, as described previously (Bagutti et al., 2001).

Full-length Necl2-FLAG (Shingai et al., 2003) was cloned into pBabe-puromycin (pBp) and sequence verified. pBp-EV and pBp-GFP retroviral vectors were used as previously described (Jensen and Watt, 2006). Keratinocyte infection was performed via Phoenix cell transfection, AM12 transduction and supernatant transfer, as described previously (Lowell et al., 2000).

#### Flow and imaging cytometry

Cells were isolated and stained for Necl2,  $\alpha 6$  integrin and CD34 using previously reported methods (Morris et al., 2004; Silva-Vargas et al., 2005). Dead cells were excluded and unstained controls used to set negative gates. Keratinocyte DNA content and involucrin expression were determined as previously described (Gandarillas and Watt, 1997; Morris et al., 2004). Cells retaining DNA label were quantified using a commercially available BrdU detection system (BD Biosciences). Data were collected using an LSR II flow cytometer (BD Biosciences).

Imaging cytometry analysis was performed using an Amnis ImageStream. Briefly, transduced human keratinocytes were isolated and stained with anti- $\alpha 6$ -integrin-FITC or anti- $\alpha 6$ -integrin-RPE (BD Biosciences). Cells were

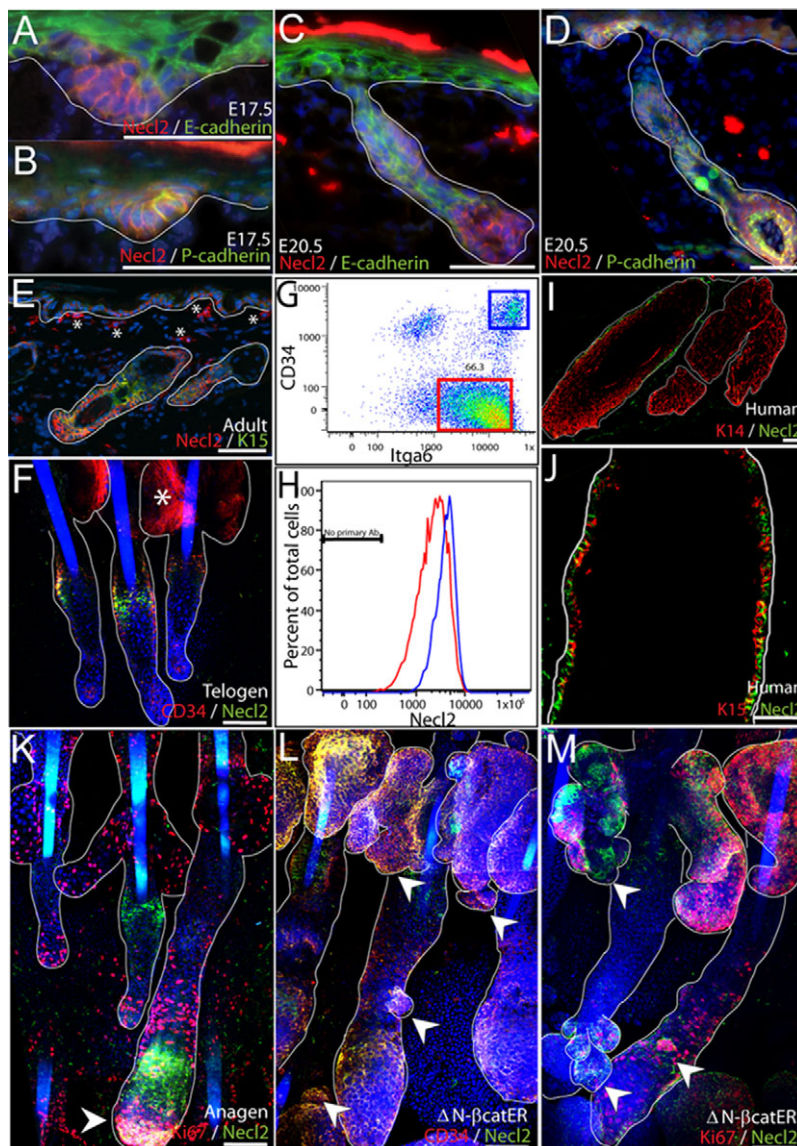

**Fig. 1. Necl2 expression in developing and adult epidermis.** (A–D) E17.5 (A,B) or E20.5 mouse skin (C,D) was stained for Necl2 (red) and E-cadherin (green, A,C) or P-cadherin (green, B,D) with DAPI nuclear counterstain (blue). (E,F) Adult mouse back skin section (E) and tail epidermal whole-mount (F) stained with antibodies against Necl2 (red, E; green, F) and keratin-15 (green, E) or CD34 (red, F) with DAPI nuclear counterstain (blue). Note staining of sebaceous glands (asterisk, F) is nonspecific. (G,H) Flow cytometric analysis of Necl2 expression (H) in adult integrin- $\alpha 6$  (Itga6)-positive basal cells (red box, G) and CD34- and Itga6-positive bulge cells (blue box, G). (I,J) Adult human hair follicles stained for Necl2 (green) and keratin-14 (red, I) or keratin-15 (red, J). (K) Necl2 (green) and Ki67 (red) immunostaining of adult mouse anagen follicles (tail epidermal whole mount) with DAPI nuclear counterstain (blue). Arrowhead indicates Necl2 expression in hair follicle bulb. (L,M) Adult tail whole mounts of K14 $\Delta$ N $\beta$ -cateninER epidermis treated with 4-hydroxy-tamoxifen for 2 weeks and stained for Necl2 (green) and CD34 (red, L) or Ki67 (red, M) with DAPI nuclear counterstain (blue). Arrowheads indicate ectopic hair follicles arising from sebaceous glands and existing follicles. White lines (A–F, I–M) indicate position of basement membrane or delineate hair follicles and sebaceous glands. Scale bars: 100  $\mu$ m in A–F, I–M.



allowed to adhere in suspension for 3 hours at 37°C, and 12,000 images were collected per sample. Two independent transduction experiments were performed for quantification of keratinocyte doublets.

### Cell motility and in vitro wound-healing assays

To measure cell motility, primary human keratinocytes were cultured in complete KSFM buffered with 100 mM HEPES pH 7.5 for 18 hours. Six image fields per culture condition per cell type (containing 10–20 cells each) were collected every 6 minutes, and individual cell tracks were plotted using Metamorph software. For each cell, the position at each time point and maximum migration distance were plotted relative to the starting position (time=0 minutes). The experiments were repeated four times.

For in vitro wound-healing assays, keratinocytes were grown to confluence in KSFM. A scratch was made across the cultures using a Gilson pipette tip and the rate of wound closure was recorded using an IncuCyte automated imaging system.

### Western blotting

Cells were incubated with hepatocyte growth factor (HGF; 10 U/ml) before washing in PBS and lysing in RIPA buffer supplemented with complete protease inhibitors cocktail (Roche) and phosphSTOP phosphatase inhibitor (Roche). Equal amounts of protein were analysed by western blotting using antibodies against CASK (Ojeh et al., 2008), FLAG tag (M2, Sigma), phosphorylated ERK (rabbit polyclonal, Cell Signaling) and  $\beta$ -tubulin (Sigma), as previously described.

### Mouse generation and husbandry

Transgenic mice expressing *Necl2* under the control of the keratin-14 gene (*Krt14*) promoter (K14*Necl2* transgenics) were prepared by cloning full-length murine *Necl2*-FLAG into the *Bam*HI site of a keratin-14 expression cassette (Lo Celso et al., 2004). The construct was sequence verified and used to produce transgenic mice as previously described (Silva-Vargas et al., 2005). Three germline-transmitting, FVB/n strain founders were generated (7526, 7248A.4, 7248A.5). Of these, founder 7248A.5 exhibited highest transgene expression and transmitted the transgene at the expected

mendelian ratio. Heterozygous offspring from this line were used in all experiments. *Necl2*-knockout mice were generated on the C57Bl/6 background by homologous recombination as previously reported (Fujita et al., 2006).

Mice were housed in individually ventilated cages on a 12 hour light-dark cycle and allowed access to food and water ad libitum. Mice were examined between 2 and 4 months of age. Cells retaining BrdU label were generated by repeated BrdU injections into 10-day-old mice, as previously described (Braun et al., 2003). All in vivo experiments were performed under the terms of a UK Home Office license.

### Skin wound healing

A single sterile 5 mm punch biopsy wound was administered along the central dorsal midline of 8-week-old female mice under general anaesthesia. Wound area was determined by measuring the sagittal (x) and transverse (y) plane wound diameter and applying these to the ellipse area formula [area= $\pi$ (radius x)(radius y)]. Mice were allowed to recover for 7 or 14 days and wound area measured each day. Two hours before sacrifice, all wounded mice received a single injection of BrdU (10 mg/kg body weight). Wound tissue was bisected along the sagittal plane; one half was processed for paraffin sections and the other for frozen sections.

## RESULTS

### *Necl2* is upregulated in bulge stem cells

At mouse embryonic day (E)17.5, when hair follicle placodes are forming, *Necl2* was detectable throughout the basal layer of the epidermis but was most highly expressed in the developing placodes, which are characterised by reduced E-cadherin and elevated P-cadherin immunoreactivity (Fig. 1A,B) (Jamora et al., 2003). At E20.5 *Necl2* expression remained enriched within hair follicles, with highest expression in the follicle bulb, where P-cadherin was also upregulated (Fig. 1C,D). In adult mouse telogen epidermis, *Necl2* was most highly expressed in the hair follicle bulge, where it was

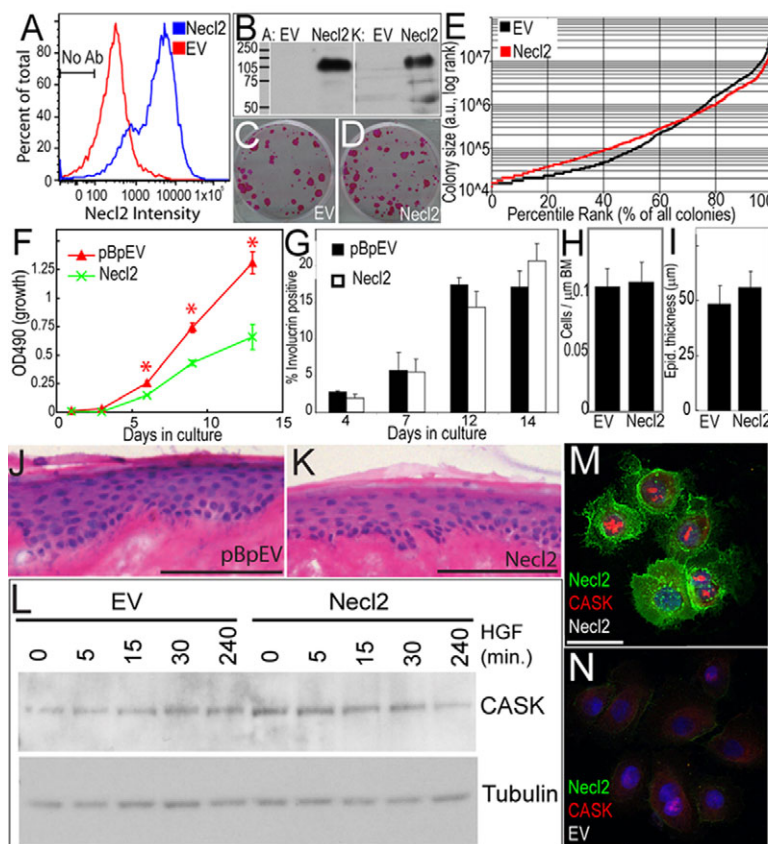

**Fig. 2. Effects of *Necl2* overexpression on growth and differentiation of cultured human keratinocytes.**

(A) Flow cytometry of keratinocytes transduced within empty vector (EV, red) or *Necl2* (blue) and labelled with anti-*Necl2*. (B) *Necl2* immunoblots of *Necl2*-transduced or control (EV) AM12 packaging cells (A) and keratinocytes (K). Molecular mass markers (kDa) are indicated. (C,D) Representative dishes of control (C) and *Necl2*-transduced (D) keratinocyte colonies 2 weeks after plating. (E) Quantification of relative size of individual control (black) and *Necl2*-transduced (red) clones. All clones ( $n > 300$ ) from one experiment are shown; data are representative of three separate experiments. (F) Keratinocyte growth was assessed by measuring mitochondrial activity (OD<sub>490</sub>; \* $P < 0.05$ ). (G) Flow cytometric determination of proportion of involucrin-positive *Necl2*-transduced and control keratinocytes. (H,I) Quantification of basal cell density (H) and epidermal thickness (I) in epidermis reconstituted by control (EV) and *Necl2*-transduced cells cultured on de-epidermised dermis. (J,K) H&E-stained sections of control (J) and *Necl2*-transduced (K) keratinocytes grown on DED substrates for 2 weeks. (L) Western blot of control and *Necl2*-transduced keratinocytes cultured in the absence of HGF (0) or stimulated with HGF for the times indicated. Blot was probed with antibodies against CASK or, as a loading control,  $\beta$ -tubulin. (M,N) Representative images of colonies transduced with *Necl2* (M) or empty vector (N) stained with antibodies against CASK (red) and *Necl2* (green). Error bars in G–I represent s.e.m. Scale bars: 100  $\mu$ m in J,K; 10  $\mu$ m in M,N.

coexpressed with the bulge markers keratin-15 and CD34 (Fig. 1E,F). As reported previously (Morii et al., 2004), we also observed *Necl2* expression in mast cells within the dermis (Fig. 1E, asterisks).

*Necl2* expression in adult bulge stem cells was confirmed by flow cytometric analysis of disaggregated cells that had been labelled with antibodies against CD34 and the  $\alpha 6$ -integrin subunit (Fig. 1G,H). We observed two discrete CD34<sup>+</sup> populations that differed in  $\alpha 6$ -integrin levels (Fig. 1G), as shown earlier (Blanpain et al., 2004; Silva-Vargas et al., 2005). When CD34<sup>+</sup>,  $\alpha 6$ -integrin 'high' keratinocytes were compared with CD34<sup>+</sup>,  $\alpha 6$ -integrin 'high' cells, the CD34<sup>+</sup> population had higher levels of cell surface *Necl2* (Fig. 1H), which is consistent with the immunofluorescence staining data (Fig. 1E,F). In addition, *Necl2* expression was upregulated in the keratin-15-positive bulge compartment of human hair follicles (Fig. 1I,J) consistent with the results of previous microarray studies (Ohyama et al., 2006).

In anagen mouse skin, *Necl2* continued to be highly expressed in the bulge. However, it was also highly upregulated in the hair follicle bulb; dual staining for *Necl2* and the proliferation marker Ki67 revealed that whereas *Necl2*-expressing cells in the bulge were quiescent, *Necl2*-expressing bulb cells were actively proliferating (Fig. 1K, arrowhead).

Ectopic hair follicles can be induced in adult mouse epidermis by 4-hydroxy-tamoxifen-induced activation of a stabilised transgene encoding  $\beta$ -catenin (K14 $\Delta$ N $\beta$ -cateninER) (Lo Celso et al., 2004; Silva-Vargas et al., 2005). We found that *Necl2* was expressed in CD34<sup>+</sup> ectopic follicles, regardless of whether they arose in the outer root sheath of existing follicles, the sebaceous glands or the interfollicular epidermis (Fig. 1L,M, arrowheads, and data not shown).

We conclude that *Necl2* expression is elevated in the reservoir of stem cells in the bulge of both mouse and human hair follicles, confirming previous microarray data (Morris et al., 2004; Ohyama et al., 2006; Tumber et al., 2004). *Necl2* undergoes dynamic

regulation during the mouse hair follicle cycle and is expressed in ectopic follicles that are induced in adult epidermis upon activation of  $\beta$ -catenin.

### ***Necl2* influences keratinocyte growth and proliferation**

To determine the functions of *Necl2*, we transduced primary human epidermal cells with full-length, FLAG-tagged murine *Necl2*. *Necl2* protein overexpression was confirmed by flow cytometry and western blotting of cells transfected with empty vector or *Necl2*, using anti-FLAG tag antibodies (Fig. 2A,B).

Overexpression of *Necl2* resulted in an increase of  $160 \pm 10\%$  (mean  $\pm$  s.e.m.) in cells that formed colonies when compared with control cells (three independent experiments; three or more replicates per sample). Although *Necl2* overexpression increased colony-forming efficiency, individual colonies were smaller than control colonies, as determined by plotting the area of individual colonies versus percentile rank (Fig. 2E). The reduction in colony size reflected a reduction in the growth rate of *Necl2*-overexpressing cells (Fig. 2F).

There was no significant difference in the proportion of cells that initiated terminal differentiation in culture, as evidenced by involucrin expression (Fig. 2G). When keratinocytes transduced with empty vector or *Necl2* were seeded onto de-epidermised human dermis and cultured at the air-medium interface for 14 days, there were no differences in the degree of stratification (as measured by epidermal thickness) or differentiation of the epidermis that they reconstituted (Fig. 2H-K). The density of cells in the basal layer of reconstituted epidermis was also unaffected by *Necl2* overexpression (Fig. 2H).

Downregulation of CASK is associated with increased keratinocyte proliferation and migration (Ojeh et al., 2008). Since CASK is one of the MAGUK proteins that binds to the *Necl2* cytoplasmic domain, we investigated whether *Necl2* overexpression

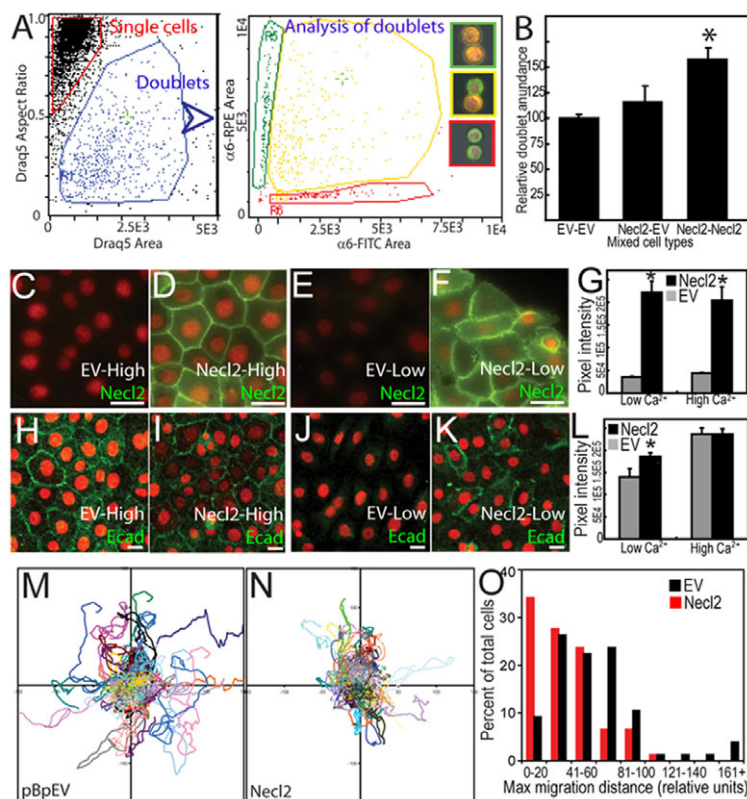

**Fig. 3. *Necl2* overexpression influences keratinocyte adhesion and motility.** (A) Identification of cell doublets based on Drag5 nuclear area/aspect ratio (left panel; blue gate) and characterisation of doublets by labelling with FITC- and RPE-conjugated anti- $\alpha 6$ -integrin antibodies (right). Insert shows representative RPE-RPE (top), RPE-FITC (middle) and FITC-FITC (bottom) stained cell doublets. (B) Quantification of relative RPE-FITC labelled EV-EV, *Necl2*-EV and *Necl2*-*Necl2* doublets. (C-G) Representative images (C-F) and quantification (G) of *Necl2* expression in control (C,E) and *Necl2*-transduced (D,F) cells cultured under standard (high; C,D) and low-calcium (E,F) conditions. (H-L) Representative images (H-K) and quantification (L) of E-cadherin expression in control (H,I) and *Necl2*-transduced (J,K) cells cultured under standard (high; H,I) and low-calcium (J,K) conditions. (G,L) Quantification of pixel intensity at cell-cell borders. (M-O) Control (M) and *Necl2*-transduced (N) cell motility tracks and maximum migration distances (O) relative to a starting position ( $x,y=0,0$ ) at time=0 minutes. Each line in M,N shows motility of an individual cell. (B,G,L) Error bars represent s.e.m.; \* $P < 0.05$ . Scale bars: 10  $\mu$ m in C-F,H-K.



affected CASK levels (Fig. 2L-N). The level of CASK was higher in cells overexpressing Nectin2 than in controls, both when cells were unstimulated and when treated with HGF, which stimulates keratinocyte motility (Birchmeier et al., 2003). By contrast, overexpression of Nectin2 had no effect on levels of Erk MAPK phosphorylation (data not shown). As reported previously (Ojeh et al., 2008), localisation of CASK was predominantly nuclear in undifferentiated keratinocytes (Fig. 2M,N).

### Nectin2 regulates intercellular adhesion and keratinocyte motility

Nectin2, like other nectin-like proteins, is believed to promote calcium-independent intercellular adhesion and adherens junction stabilisation by enhancing recruitment of cadherins to cell-cell borders (Takai et al., 2003). Consistent with this, *Nectin2*-transduced keratinocytes were resistant to disaggregation by trypsin and EDTA. Under conditions in which nearly all control keratinocytes formed a single cell suspension, flow cytometric analysis revealed that a significant proportion of *Nectin2*-transduced cells remained as aggregates of two or more cells (data not shown).

To examine the effect of Nectin2 on homotypic and heterotypic intercellular adhesion, cells transduced with *Nectin2* or empty vector (EV) were disaggregated into single cell suspensions. Each population was divided into two and labelled with FITC- or RPE-conjugated antibodies to the  $\alpha 6$ -integrin subunit, a pan basal cell marker (Silva-Vargas et al., 2005). Equal numbers of FITC- and RPE-labelled cells were combined homotypically (EV+EV or

Nectin2+Nectin2) or heterotypically (EV+Nectin2) and incubated in suspension at 37°C for 3 hours on an orbital shaker. At the end of the incubation period, cells were labelled with Draq5 and imaging cytometry was used to distinguish cell singlets and doublets based on nuclear labelling (Fig. 3A, left panel). Doublets were segregated according to whether they represented cells labelled with RPE+RPE, FITC+FITC or RPE+FITC (Fig. 3A, right panel). RPE+FITC-labelled doublets, corresponding to cells that must have adhered during incubation in suspension, were quantified (Fig. 3B). The combination of Nectin2+Nectin2 cells formed significantly more doublets than EV+EV cells or EV+Nectin2 cells, demonstrating that Nectin2 overexpression promoted homotypic intercellular adhesion.

To determine whether Nectin2 promoted intercellular junction assembly, we cultured keratinocytes transduced with empty vector or *Nectin2* in standard and low-calcium medium (Fig. 3C-L), and examined expression of E-cadherin, as a marker of adherens junctions, and desmoplakin, which is a desmosome marker. Flag-tagged Nectin2 was readily detected at cell-cell borders when cells were cultured in both standard ('high') and low-calcium medium (Fig. 3C-G). In standard calcium conditions, there were no detectable differences in E-cadherin localisation, with intense staining at all cellular borders in both control and *Nectin2*-transduced keratinocytes (Fig. 3H,I,L). In low-calcium medium, control cells exhibited reduced or undetectable E-cadherin staining at cell-cell borders (Fig. 3J,L). By contrast, E-cadherin staining in *Nectin2*-transduced keratinocytes was readily detectable at cell-cell borders under low-calcium conditions (Fig. 3K,L). Although Nectin2 expression stabilised E-cadherin

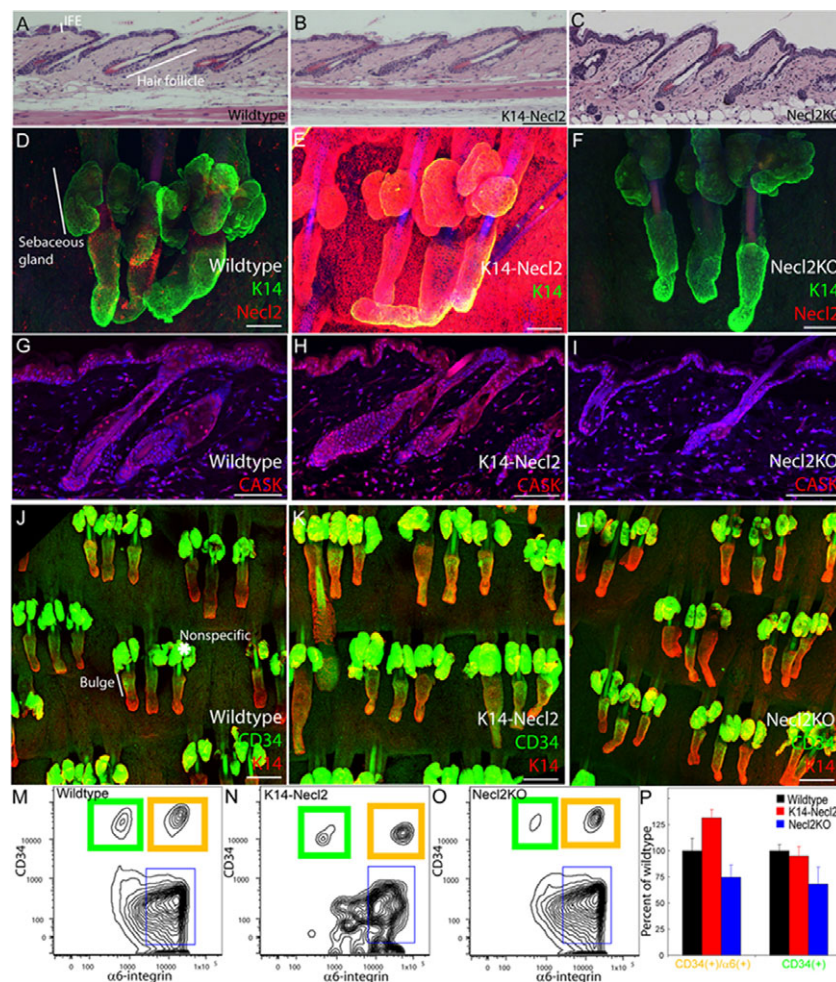

**Fig. 4. Overexpression or deletion of Nectin2 does not disturb epidermal homeostasis.** (A-C) H&E-stained sections of dorsal skin of wild-type (A), K14Nectin2 transgenic (B) and *Nectin2*-knockout mice (C). (D-F) Tail epidermal whole mounts of wild-type (D), K14Nectin2 transgenic (E) and *Nectin2*-knockout (F) mice stained for keratin-14 (green) and Nectin2 (red), with DAPI nuclear counterstain (blue). (G-I) Wild-type (G), K14Nectin2 transgenic (H) and *Nectin2*-null (I) dorsal skin sections stained with anti-CASK (red) and DAPI nuclear counterstain (blue). (J-L) Tail epidermal whole mounts of wild-type (J), K14Nectin2 transgenic (K) and *Nectin2*-null (L) mice stained for keratin-14 (red) and CD34 (green). (M-P) Flow cytometric analysis of  $\alpha 6$ -integrin and CD34 double-positive (orange boxes) and  $\alpha 6$ -integrin-positive, CD34-negative (green boxes) cells in wild-type (M), K14Nectin2 transgenic (N) and *Nectin2*-knockout (O) mouse epidermis. (P) Relative abundance of cells in M-O. IFE, interfollicular epidermis. Asterisk in J indicates nonspecific staining of sebaceous gland. Scale bars: 100  $\mu$ m in A-L.

membrane localisation, it did not affect the localisation of desmoplakin, which accumulated at cell-cell borders only under standard calcium concentrations (data not shown).

To ascertain whether increased Necl2-mediated adhesion affected keratinocyte motility, we cultured control and *Necl2*-transduced human keratinocytes in standard FAD medium (approximately 1.2 mM Ca<sup>2+</sup>) or low-calcium (KSFM, 0.09 mM Ca<sup>2+</sup>) medium and monitored their behaviour by time-lapse microscopy. Using standard culture conditions, there were no significant differences in keratinocyte motility (data not shown). By contrast, *Necl2*-transduced keratinocytes cultured in KSFM displayed a marked reduction in cellular motility when compared with cells transduced with empty vector (Fig. 3M–O). This was quantified by measuring the overall maximum migration distance of *Necl2*-expressing keratinocytes and control cells (compare red and black, Fig. 3O).

We also examined whether Necl2 overexpression affected in vitro wound healing. Keratinocytes transduced with *Necl2* or empty vector were cultured to confluence in KSFM. The cultures were then wounded with a Gilson pipette tip and the time taken for wound closure was recorded by live cell imaging. Control cells closed the

wound in an average of 568±99 minutes (nine wounds). The average time to wound closure in four independent *Necl2*-transduced cultures was significantly slower at 1880±9 minutes (*P*<0.003). In a further four cases, *Necl2*-transduced cells failed to close the wound by the end of the recording period. From these experiments, we conclude that Necl2 overexpression promotes intercellular adhesion under low-calcium conditions, thereby reducing cell motility and in vitro wound healing.

Necl2 levels do not affect normal epidermal homeostasis

To investigate the functions of Necl2 in vivo, we generated transgenic mice in which Necl2 was overexpressed via the keratin-14 gene (*Krt14*) promoter in the epidermal basal layer, undifferentiated cells of the sebaceous gland and hair follicle outer root sheath (K14Necl2 transgenics). Three independent transgenic lines were generated and the line with highest expression (7248A.5) was selected for detailed analysis. We also examined mice in which *Necl2* has been deleted by homologous recombination (*Necl2*-knockout) (Fujita et al., 2006).

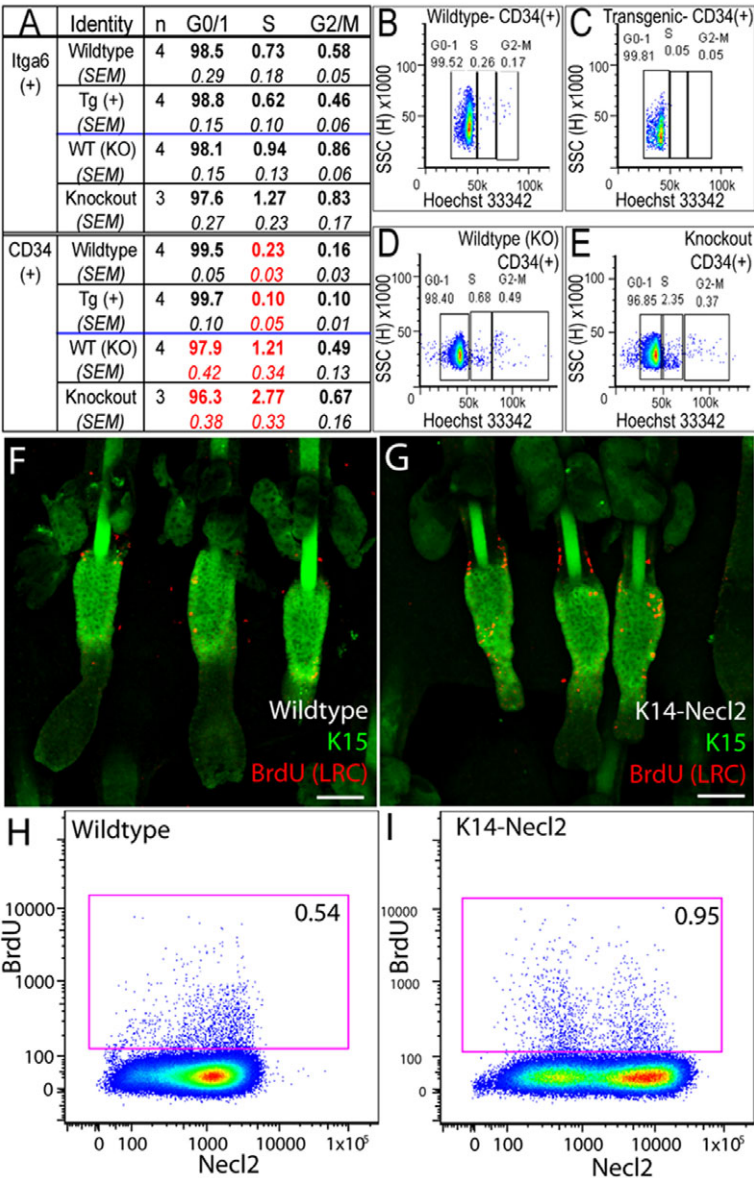

**Fig. 5. Necl2 overexpression reduces epidermal proliferation.** (A–E) Determination of proportion of cells in G0–G1, S, G2–M phases of the cell cycle by flow cytometry of cells labelled with Hoechst 33342. (A) Total undifferentiated cells ( $\alpha$ 6-integrin positive; Itga6<sup>+</sup>) or bulge cells (CD34 and  $\alpha$ 6-integrin double positive; CD34<sup>+</sup>) are shown beneath the appropriate wild-type controls. Data shown are means±s.e.m. from three transgenic and four matched wild-type controls and from four transgenic and four matched wild-type mice. Values in red are significantly different from controls (*P*≤0.05). (B–E) Representative flow cytometry profiles of CD34<sup>+</sup> bulge populations, showing position of cell cycle gates in wild-type versus K14-Necl2 transgenic mice (B,C) and wild-type versus *Necl2*-knockout mice (D,E). (F,G) Tail epidermal whole mounts from wild-type (F) and transgenic (G) mice labelled with anti-BrdU (to detect LRC; red) and K15 (green). (H,I) Representative flow cytometry plots of BrdU-labelled LRC (red boxes) in wild-type (H) and K14Necl2 transgenic (I) epidermis. Numbers refer to percentage BrdU-positive cells. Cells were double labelled with anti-Necl2. Scale bars: 100  $\mu$ m in F,G.



Analysis of haematoxylin and eosin (H&E)-stained sections of adult dorsal telogen and anagen skin and tail epidermal whole mounts did not reveal any abnormalities in K14Necl2 or *Necl2*-null mice (Fig. 4A-F). There were no effects on interfollicular epidermal thickness or differentiation and the sebaceous glands and hair growth cycle were grossly normal (Fig. 4A-F; and data not shown). We confirmed the presence or absence of Necl2 in wild-type, transgenic and knockout mice by antibody staining of tail epidermal whole mounts (Fig. 4D-F).

CASK immunoreactivity was increased in K14Necl2 epidermis; however, *Necl2* deletion did not significantly reduce CASK expression relative to wild-type epidermis (Fig. 4G-I). No differences in E-cadherin staining were observed (data not shown). CD34 expression in the hair follicle bulge was unaffected by Necl2 loss or overexpression, when evaluated both by whole-mount labelling (Fig. 4J-L) and by flow cytometry of disaggregated epidermal cells (Fig. 4M-P).

These results are consistent with the lack of an effect of Necl2 overexpression on terminal differentiation of primary human keratinocytes (Fig. 2G-K).

### Overexpression of Necl2 results in decreased proliferation of bulge stem cells

Since overexpression of Necl2 reduced the growth rate of cultured keratinocytes (Fig. 2F), we examined the proliferative status of *Necl2*-knockout and K14Necl2 transgenic mouse epidermis. Data in Fig. 5A-E are representative of at least two experiments with independent cohorts of mice. The proportion of  $\alpha 6$ -integrin-positive epidermal cells (total basal cells) in each phase of the cell cycle was determined by DNA labelling with Hoechst 33342. There were no

statistically significant differences in the proportion of G0-G1, S or G2-M phase cells in K14Necl2 transgenic, wild-type and *Necl2*-null epidermis (Fig. 5A). However, when we analysed CD34 and  $\alpha 6$ -integrin double-positive cells (bulge cells) we observed a statistically significant reduction in S-phase cells in K14Necl2 transgenics relative to strain-matched wild-type controls (Fig. 5A-C). Conversely, there was a significant increase in cells in S-phase and a reduction in G0-G1-phase cells in *Necl2*-null bulge cells relative to the appropriate wild-type controls (Fig. 5A,D,E).

To examine whether reduced proliferation in K14Necl2 transgenic bulge keratinocytes influenced BrdU label-retaining cell (LRC) abundance, neonatal mice were given repeated injections of BrdU and subsequently examined in adulthood (Braun et al., 2003). The number of LRCs was increased in *Necl2*-overexpressing mice, with labelled cells lying primarily in the bulge (Fig. 5F,G). These results were confirmed by flow cytometry (Fig. 5H,I).

We conclude that although Necl2 levels do not affect epidermal differentiation (Figs 2 and 4), Necl2 overexpression does result in reduced epidermal proliferation, both in culture and in vivo. Thus, although Necl2 expression is not confined to regions of low proliferation (Fig. 1), Necl2 might, in combination with other regulators (Horsley et al., 2008; Jensen and Watt, 2006; Jensen et al., 2009), promote quiescence in hair follicle keratinocytes.

### Overexpression of Necl2 impairs epidermal wound healing

Given the effects of Necl2 on keratinocyte motility and intercellular adhesion in culture (Fig. 3), we predicted that Necl2 would influence skin wound healing. We created 5-mm-diameter

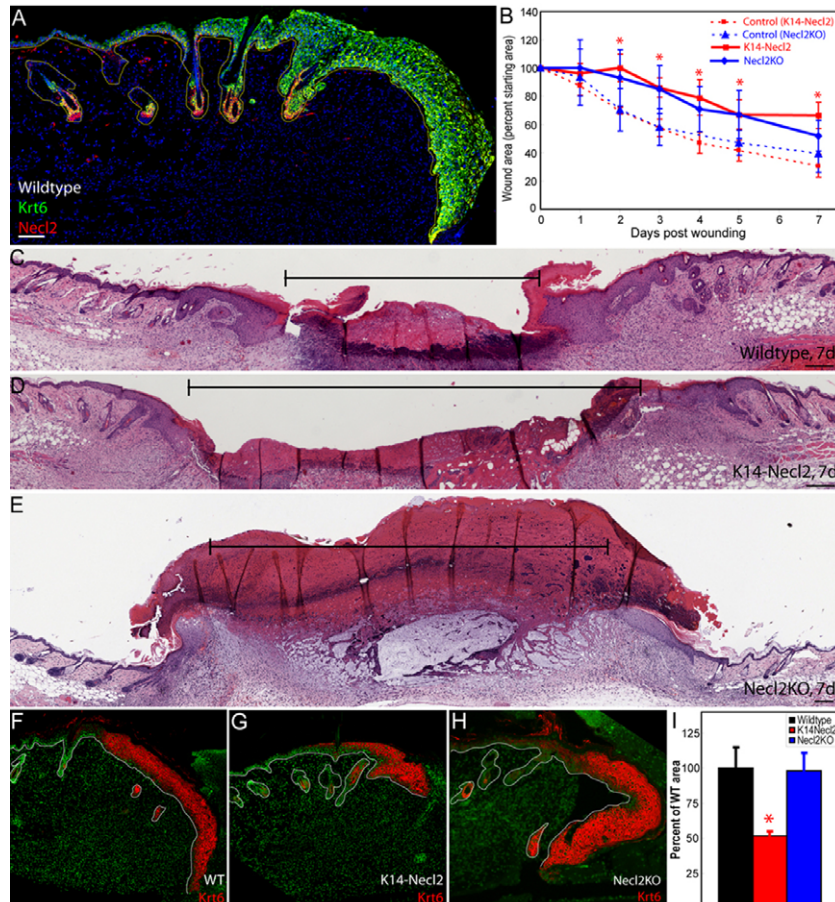

**Fig. 6. Skin wound healing is modulated by Necl2.** (A) Wild-type skin collected 7 days after wounding stained for Necl2 (red), keratin-6 (green) and DAPI (blue). (B) Wound size, expressed as a percentage of starting wound area, with time after wounding. Data are represented as mean values  $\pm$  s.e.m. (C-E) Representative H&E-stained sections of wild-type (C), K14Necl2 transgenic (D), and *Necl2*-knockout (E) mouse skin 7 days after wounding. Brackets show distance between wound margins. (F-H) Keratin-6 (red) and DAPI (green) labelling of the leading edge of re-epithelialisation 7 days after wounding wild-type (F), K14Necl2 transgenic (G) and *Necl2*-knockout (H) mice. (I) Quantification of average keratin-6-positive area per section prepared as in F-H, expressed as a percentage of wild-type controls. Data represent average of two sections per wound from a minimum of five animals. Error bars in B and I represent s.e.m.; \* $P < 0.05$ . Scale bars: 100  $\mu$ m in A, C-E; 50  $\mu$ m in F-H.



full thickness wounds on the back skin of age- and sex-matched K14Nec12 and transgene-negative littermates as well as *Nec12*-knockout and wild-type littermates and measured average wound size over time (Fig. 6). *Nec12* was not observed in the hyperplastic epithelial front 7 days after wounding in wild-type mice (Fig. 6A). Relative to appropriate congenic wild-type controls (dashed blue and red lines, Fig. 6B), wound closure was significantly delayed both when *Nec12* was overexpressed (red line) and when *Nec12* was absent (blue line) (Fig. 6B). Both control mouse strains (FVB/n and C57/Bl6, red and blue dashed lines respectively) exhibited similar wound-healing kinetics.

The histological appearance of K14Nec12 and wild-type wounds was indistinguishable at all time points (Fig. 6C,D; and data not shown). However, the slow healing of *Nec12*-null wounds 7 days after wounding was associated with the formation of an abnormally large granulation tissue mass (Fig. 6E). Although no clear differences between wild-type and K14Nec12 wounds were

observed in H&E-stained sections, the upregulation of keratin-6 that is characteristic of hyperproliferative healing epidermis (Grose et al., 2002; Gurtner et al., 2008) was markedly reduced in K14Nec12 transgenic wounds (Fig. 6F-I).

To examine the mechanism by which *Nec12* overexpression affected wound closure, S-phase cells were labelled by injecting mice with BrdU 7 days after wounding. There were significantly fewer labelled cells in the area immediately adjacent to the leading edge of wounds in transgenic compared with wild-type mice (Fig. 7A-D). By contrast, there was no significant difference between *Nec12*-null and wild-type epidermis (Fig. 7A-D).

Although CASK expression was generally increased following wounding, expression was markedly reduced in the tongue of epithelial cells that formed the leading front of re-epithelialisation in wild-type mice (Fig. 7E,F), as has been previously reported (Ojeh et al., 2008). By contrast, CASK expression was typically maintained in the epithelial tongue in K14Nec12 transgenic mice

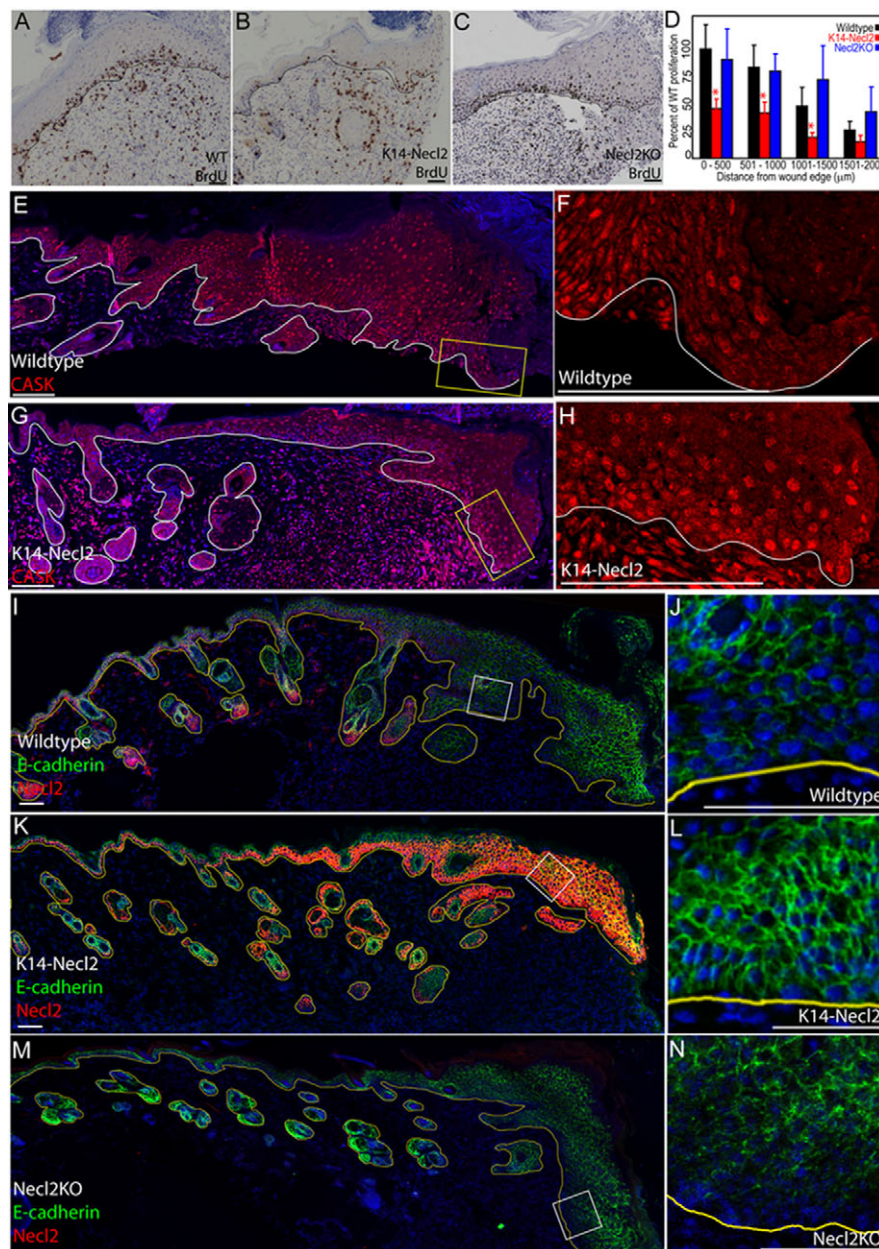

**Fig. 7. *Nec12* overexpression decreases proliferation and leads to upregulation of E-cadherin and CASK during wound healing.** (A-C) BrdU-labelled S-phase cells (brown, A-C) at the leading edge of healing wild-type (A), transgenic (B) and *Nec12*-knockout (C) mouse epidermis. (D) Quantification of BrdU-positive cells as a function of distance from the wound edge in wild-type (black bars), transgenic (red bars), and knockout mice (blue bars). Data are presented relative to appropriate congenic wild-type controls ( $n=4$  knockout mice/group;  $n=8$  transgenic mice/group). Error bars show s.e.m.;  $*P<0.05$ . (E-H) Wounded wild-type (E, F) or K14Nec12 transgenic (G, H) epidermis stained with anti-CASK (red) and DAPI nuclear counterstain (blue; E, G). (I-N) E-cadherin (green, I-N) and *Nec12* (red, I, K, M) expression at the leading edge of re-epithelialising wounds, 7 days after wounding. (E, G, I-N) DAPI nuclear counterstain (blue). Lines (A-C, E-N) denote dermal-epidermal boundary and boxes (E, G, I, K, M) denote regions shown at higher magnification in adjacent panels. Scale bars: 50  $\mu$ m in A-C; 100  $\mu$ m in E-N.



(Fig. 7G,H). No differences in CASK expression between C57/Bl6 wild-type and *Nectin2*-null mice following wounding were observed (data not shown).

To assess adherens junction stability after wounding, we stained epidermis of wild-type, transgenic and *Nectin2*-null mice with anti-E-cadherin (Fig. 7I-N). E-cadherin expression in the epidermal basal layer was reduced in conjunction with downregulation of Nectin2 at the leading edge of healing wounds in wild-type mice (Fig. 7I,J). By contrast, Nectin2 transgenic mice, but not knockout mice, maintained E-cadherin expression throughout the hyperplastic wounded area (Fig. 7K-N). These results suggest that Nectin2 modulates epidermal E-cadherin and CASK stability during wound healing.

## DISCUSSION

We show that the cell adhesion molecule Nectin2 is expressed in embryonic hair follicles and adult bulge stem cells. We propose that within the hair follicle, Nectin2 functions both as an inhibitor of stem cell proliferation and as an adhesion molecule that limits departure from the bulge by reducing motility and promoting intercellular adhesion. Nectin2 expression does not autonomously influence differentiation or lineage selection, but does modulate wound healing.

From our experiments on cultured keratinocytes, we conclude that the major effect of overexpression of Nectin2 is to promote intercellular adhesion, thereby reducing cell migration and overall motility. Nectin2 overexpression also has modest effects on cell growth, but these do not affect the ability of cultured epidermis to stratify and undergo terminal differentiation.

Our observation that Nectin2 is enriched within human and murine stem cells suggests that Nectin2-dependent adhesion might provide keratinocytes with enhanced resistance to calcium fluctuations resulting from physiological or environmental stress. These findings might partially explain previous observations that bulge stem cells are more resistant to epidermal injury (Huelsken et al., 2001). The upregulation of Nectin2 in the bulb of anagen follicles (see Fig. 1K) might also regulate the invasion of the dermis as the follicle elongates (Fuchs, 2009). Notwithstanding our observations, the lack of an overt skin phenotype in uninjured *Nectin2*-knockout mice probably reflects partial or complete functional redundancy among nectin and nectin-like proteins (Fujita et al., 2006; van der Weyden et al., 2006; Yamada et al., 2006).

Although it is known that bulge stem cells contribute to epidermal wound healing, the mechanisms by which this occurs have largely remained elusive (Ito et al., 2005). We found that endogenous Nectin2 expression was reduced in healing wounds and that loss or overexpression of Nectin2 impaired wound healing. Our in vitro and in vivo results suggest that the effect of Nectin2 overexpression was due to reduced cell proliferation and migration, correlating with enhanced adherens junction stability and maintenance of CASK expression (Ojeh et al., 2008). Our results are consistent with previous studies which demonstrate that Nectin2 overexpression in kidney cells suppresses HGF-dependent cell scattering and motility because of retention of E-cadherin-based intercellular adhesion (Masuda et al., 2005).

The reduced skin wound healing of *Nectin2*-null mice did not correlate with effects on proliferation or E-cadherin and CASK levels, but was associated with an increase in granulation tissue. We speculate that the reduction in wound healing could either reflect the role of Nectin2 in mast cells or in heterotypic adhesion to CRTAM, which is expressed on activated T cells that traffic through the skin. Mast cells have an important role in skin wound healing and Nectin2 is known to affect mast cell function, adhesion, and survival (Watabe

et al., 2004; Weller et al., 2006). It is also possible that Nectin2-CRTAM-dependent T cell interactions influence wound healing by modulating tissue inflammation, extracellular matrix deposition and macrophage or neutrophil-dependent granuloma clearance (Jameson and Havran, 2007).

Our data are consistent with previous observations regarding Nectin2 function in other cell types and tissues (Ito et al., 2007; Masuda et al., 2005) and with the known functions of E-cadherin and CASK in epidermal development and homeostasis (Jamora et al., 2003; Jamora et al., 2005; Ojeh et al., 2008; Tinkle et al., 2004; Young et al., 2003). Our findings highlight the dual role of adhesion molecules as regulators of the location and proliferation of adult tissue stem cells.

## Acknowledgements

We gratefully acknowledge Kristin Braun and Dawn Mazzatti for critical reading of the manuscript and the core facilities of the CRUK London and Cambridge Research Institutes for expert technical assistance. A.G. was the recipient of an NIH Postdoctoral Fellowship. These studies were funded by Cancer Research UK, the Wellcome Trust, the Medical Research Council and the European Union. We gratefully acknowledge the support of Hutchison-Whampoa and Cambridge University. Deposited in PMC for release after 6 months.

## References

- Bagutti, C., Hutter, C., Chiquet-Ehrismann, R., Fässler, R. and Watt, F. M. (2001). Dermal fibroblast-derived growth factors restore the ability of  $\beta 1$  integrin-deficient embryonic stem cells to differentiate into keratinocytes. *Dev. Biol.* **231**, 321-333.
- Benitah, S. A., Frye, M., Glogauer, M. and Watt, F. M. (2005). Stem cell depletion through epidermal deletion of Rac1. *Science* **309**, 933-935.
- Birchmeier, C., Birchmeier, W., Gherardi, E. and Vande Woude, G. F. (2003). Met, metastasis, motility and more. *Nat. Rev. Mol. Cell Biol.* **4**, 915-925.
- Blanpain, C., Lowry, W. E., Geoghegan, A., Polak, L. and Fuchs, E. (2004). Self-renewal, multipotency, and the existence of two cell populations within an epithelial stem cell niche. *Cell* **118**, 635-648.
- Brakebusch, C., Grose, R., Quondamatteo, F., Ramirez, A., Jorcano, J. L., Pirro, A., Svensson, M., Herken, R., Sasaki, T., Timpl, R. et al. (2000). Skin and hair follicle integrity is crucially dependent on beta 1 integrin expression on keratinocytes. *EMBO J.* **19**, 3990-4003.
- Braun, K. M., Niemann, C., Jensen, U. B., Sundberg, J. P., Silva-Vargas, V. and Watt, F. M. (2003). Manipulation of stem cell proliferation and lineage commitment: visualisation of label-retaining cells in wholemounts of mouse epidermis. *Development* **130**, 5241-5255.
- Estrach, S., Legg, J. and Watt, F. M. (2007). Syntenin mediates Delta1-induced cohesiveness of epidermal stem cells in culture. *J. Cell Sci.* **120**, 2944-2952.
- Fuchs, E. (2007). Scratching the surface of skin development. *Nature* **445**, 834-842.
- Fuchs, E. (2009). The tortoise and the hair: slow-cycling cells in the stem cell race. *Cell* **137**, 811-819.
- Fuchs, E., Dowling, J., Segre, J., Lo, S. H. and Yu, Q. C. (1997). Integrators of epidermal growth and differentiation: distinct functions for  $\beta 1$  and  $\beta 4$  integrins. *Curr. Opin. Genet. Dev.* **7**, 672-682.
- Fujita, E., Kourouk, Y., Ozeki, S., Tanabe, Y., Toyama, Y., Maekawa, M., Kojima, N., Senoo, H., Toshimori, K. and Momoi, T. (2006). Oligo-asthenoteratozoospermia in mice lacking RA175/TS1/SLC1/SyncAM/IGSF4A, a cell adhesion molecule in the immunoglobulin superfamily. *Mol. Cell. Biol.* **26**, 718-726.
- Galibert, L., Diemer, G. S., Liu, Z., Johnson, R. S., Smith, J. L., Walzer, T., Comeau, M. R., Rauch, C. T., Wolfson, M. F., Sorensen, R. A. et al. (2005). Nectin-like protein 2 defines a subset of T-cell zone dendritic cells and is a ligand for class-I-restricted T-cell-associated molecule. *J. Biol. Chem.* **280**, 21955-21964.
- Gandarillas, A. and Watt, F. M. (1997). c-Myc promotes differentiation of human epidermal stem cells. *Genes Dev.* **11**, 2869-2882.
- Grose, R., Hutter, C., Bloch, W., Thorey, I., Watt, F. M., Fässler, R., Brakebusch, C. and Werner, S. (2002). A crucial role of  $\beta 1$  integrins for keratinocyte migration in vitro and during cutaneous wound repair. *Development* **129**, 2303-2315.
- Gurtner, G. C., Werner, S., Barrandon, Y. and Longaker, M. T. (2008). Wound repair and regeneration. *Nature* **453**, 314-321.
- Halbleib, J. M. and Nelson, W. J. (2006). Cadherins in development: cell adhesion, sorting, and tissue morphogenesis. *Genes Dev.* **20**, 3199-3214.
- Horsley, V., Aliprantis, A. O., Polak, L., Glimcher, L. H. and Fuchs, E. (2008). NFATc1 balances quiescence and proliferation of skin stem cells. *Cell* **132**, 299-310.

- Huelsken, J., Vogel, R., Erdmann, B., Cotsarelis, G. and Birchmeier, W. (2001).  $\beta$ -Catenin controls hair follicle morphogenesis and stem cell differentiation in the skin. *Cell* **105**, 533-545.
- Ito, A., Nishikawa, Y., Ohnuma, K., Ohnuma, I., Koma, Y., Sato, A., Enomoto, K., Tsujimura, T. and Yokozaki, H. (2007). SglGSF is a novel biliary-epithelial cell adhesion molecule mediating duct/ductule development. *Hepatology* **45**, 684-694.
- Ito, M., Liu, Y., Yang, Z., Nguyen, J., Liang, F., Morris, R. J. and Cotsarelis, G. (2005). Stem cells in the hair follicle bulge contribute to wound repair but not to homeostasis of the epidermis. *Nat. Med.* **11**, 1351-1354.
- Ito, T., Shimada, Y., Hashimoto, Y., Kaganoi, J., Kan, T., Watanabe, G., Murakami, Y. and Imamura, M. (2003). Involvement of TSLC1 in progression of esophageal squamous cell carcinoma. *Cancer Res.* **63**, 6320-6326.
- Jameson, J. and Havran, W. L. (2007). Skin  $\gamma\delta$  T-cell functions in homeostasis and wound healing. *Immunol. Rev.* **215**, 114-122.
- Jamora, C., DasGupta, R., Kocieniewski, P. and Fuchs, E. (2003). Links between signal transduction, transcription and adhesion in epithelial bud development. *Nature* **422**, 317-322.
- Jamora, C., Lee, P., Kocieniewski, P., Azhar, M., Hosokawa, R., Chai, Y. and Fuchs, E. (2005). A signaling pathway involving TGF- $\beta$ 2 and snail in hair follicle morphogenesis. *PLoS Biol.* **3**, e11.
- Jensen, K. B. and Watt, F. M. (2006). Single-cell expression profiling of human epidermal stem and transit-amplifying cells: Lrig1 is a regulator of stem cell quiescence. *Proc. Natl. Acad. Sci. USA* **103**, 11958-11963.
- Jensen, K. B., Collins, C. A., Nascimento, E., Tan, D. W., Frye, M., Itami, S. and Watt, F. M. (2009). Lrig1 expression defines a distinct multipotent stem cell population in mammalian epidermis. *Cell Stem Cell* **4**, 427-439.
- Lo Celso, C., Prowse, D. M. and Watt, F. M. (2004). Transient activation of  $\beta$ -catenin signalling in adult mouse epidermis is sufficient to induce new hair follicles but continuous activation is required to maintain hair follicle tumours. *Development* **131**, 1787-1799.
- Lopez-Rovira, T., Silva-Vargas, V. and Watt, F. M. (2005). Different consequences of  $\beta$ 1 integrin deletion in neonatal and adult mouse epidermis reveal a context-dependent role of integrins in regulating proliferation, differentiation, and intercellular communication. *J. Invest. Dermatol.* **125**, 1215-1227.
- Lowell, S., Jones, P., Le Roux, I., Dunne, J. and Watt, F. M. (2000). Stimulation of human epidermal differentiation by Delta-Notch signalling at the boundaries of stem-cell clusters. *Curr. Biol.* **10**, 491-500.
- Mao, X., Seidlitz, E., Ghosh, K., Murakami, Y. and Ghosh, H. P. (2003). The cytoplasmic domain is critical to the tumor suppressor activity of TSLC1 in non-small cell lung cancer. *Cancer Res.* **63**, 7979-7985.
- Masuda, M., Kikuchi, S., Maruyama, T., Sakurai-Yageta, M., Williams, Y. N., Ghosh, H. P. and Murakami, Y. (2005). Tumor suppressor in lung cancer (TSLC1) suppresses epithelial cell scattering and tubulogenesis. *J. Biol. Chem.* **280**, 42164-42171.
- Molès, J. P. and Watt, F. M. (1997). The epidermal stem cell compartment: variation in expression levels of E-cadherin and catenins within the basal layer of human epidermis. *J. Histochem. Cytochem.* **45**, 867-874.
- Morii, E., Ito, A., Jippo, T., Koma, Y., Oboki, K., Wakayama, T., Iseki, S., Lamoreux, M. L. and Kitamura, Y. (2004). Number of mast cells in the peritoneal cavity of mice: influence of microphthalmia transcription factor through transcription of newly found mast cell adhesion molecule, spermatogenic immunoglobulin superfamily. *Am. J. Pathol.* **165**, 491-499.
- Morris, R. J., Liu, Y., Marles, L., Yang, Z., Trempus, C., Li, S., Lin, J. S., Sawicki, J. A. and Cotsarelis, G. (2004). Capturing and profiling adult hair follicle stem cells. *Nat. Biotechnol.* **22**, 411-417.
- Ohyama, M., Terunuma, A., Tock, C. L., Radonovich, M. F., Pise-Masison, C. A., Hopping, S. B., Brady, J. N., Udey, M. C. and Vogel, J. C. (2006). Characterization and isolation of stem cell-enriched human hair follicle bulge cells. *J. Clin. Invest.* **116**, 249-260.
- Ojeh, N., Pekovic, V., Jahoda, C. and Määttä, A. (2008). The MAGUK-family protein CASK is targeted to nuclei of the basal epidermis and controls keratinocyte proliferation. *J. Cell Sci.* **121**, 2705-2717.
- Perez-Moreno, M., Jamora, C. and Fuchs, E. (2003). Sticky business: orchestrating cellular signals at adherens junctions. *Cell* **112**, 535-548.
- Sevilla, L. M., Nachat, R., Groot, K. R. and Watt, F. M. (2008). Kazrin regulates keratinocyte cytoskeletal networks, intercellular junctions and differentiation. *J. Cell Sci.* **121**, 3561-3569.
- Shingai, T., Ikeda, W., Kakunaga, S., Morimoto, K., Takekuni, K., Itoh, S., Satoh, K., Takeuchi, M., Imai, T., Monden, M. et al. (2003). Implications of nectin-like molecule-2/IGSF4/RA175/SglGSF/TSLC1/SynCAM1 in cell-cell adhesion and transmembrane protein localization in epithelial cells. *J. Biol. Chem.* **278**, 35421-35427.
- Silva-Vargas, V., Lo Celso, C., Giangreco, A., Ofstad, T., Prowse, D. M., Braun, K. M. and Watt, F. M. (2005).  $\beta$ -Catenin and Hedgehog signal strength can specify number and location of hair follicles in adult epidermis without recruitment of bulge stem cells. *Dev. Cell* **9**, 121-131.
- Suzuki, K., Hu, D., Bustos, T., Zlotogora, J., Richieri-Costa, A., Helms, J. A. and Spritz, R. A. (2000). Mutations of PVRL1, encoding a cell-cell adhesion molecule/herpesvirus receptor, in cleft lip/palate-ectodermal dysplasia. *Nat. Genet.* **25**, 427-430.
- Takai, Y., Irie, K., Shimizu, K., Sakisaka, T. and Ikeda, W. (2003). Nectins and nectin-like molecules: roles in cell adhesion, migration, and polarization. *Cancer Sci.* **94**, 655-667.
- Takai, Y., Miyoshi, J., Ikeda, W. and Ogita, H. (2008). Nectins and nectin-like molecules: roles in contact inhibition of cell movement and proliferation. *Nat. Rev. Mol. Cell. Biol.* **9**, 603-615.
- Tinkle, C. L., Lechler, T., Pasolli, H. A. and Fuchs, E. (2004). Conditional targeting of E-cadherin in skin: insights into hyperproliferative and degenerative responses. *Proc. Natl. Acad. Sci. USA* **101**, 552-557.
- Tumbar, T., Guasch, G., Greco, V., Blanpain, C., Lowry, W. E., Rendl, M. and Fuchs, E. (2004). Defining the epithelial stem cell niche in skin. *Science* **303**, 359-363.
- van der Weyden, L., Arends, M. J., Chausiaux, O. E., Ellis, P. J., Lange, U. C., Surani, M. A., Affara, N., Murakami, Y., Adams, D. J. and Bradley, A. (2006). Loss of TSLC1 causes male infertility due to a defect at the spermatid stage of spermatogenesis. *Mol. Cell. Biol.* **26**, 3595-3609.
- Wakamatsu, K., Ogita, H., Okabe, N., Irie, K., Tanaka-Okamoto, M., Ishizaki, H., Ishida-Yamamoto, A., Iizuka, H., Miyoshi, J. and Takai, Y. (2007). Up-regulation of loricrin expression by cell adhesion molecule nectin-1 through Rap1-ERK signaling in keratinocytes. *J. Biol. Chem.* **282**, 18173-18181.
- Watabe, K., Ito, A., Koma, Y., Wakayama, T., Iseki, S., Shinomura, Y. and Kitamura, Y. (2004). Distinct roles for the SglGSF adhesion molecule and c-kit receptor tyrosine kinase in the interaction between mast cells and the mesentery. *Biochem. Biophys. Res. Commun.* **324**, 782-788.
- Watt, F. M. (2002). Role of integrins in regulating epidermal adhesion, growth and differentiation. *EMBO J.* **21**, 3919-3926.
- Watt, F. M., Lo Celso, C. and Silva-Vargas, V. (2006). Epidermal stem cells: an update. *Curr. Opin. Genet. Dev.* **16**, 518-524.
- Weller, K., Foitzik, K., Paus, R., Syska, W. and Maurer, M. (2006). Mast cells are required for normal healing of skin wounds in mice. *FASEB J.* **20**, 2366-2368.
- Yamada, D., Yoshida, M., Williams, Y. N., Fukami, T., Kikuchi, S., Masuda, M., Maruyama, T., Ohta, T., Nakae, D., Maekawa, A. et al. (2006). Disruption of spermatogenic cell adhesion and male infertility in mice lacking TSLC1/IGSF4, an immunoglobulin superfamily cell adhesion molecule. *Mol. Cell. Biol.* **26**, 3610-3624.
- Young, P., Boussadia, O., Halfter, H., Grose, R., Berger, P., Leone, D. P., Robenek, H., Charnay, P., Kemler, R. and Suter, U. (2003). E-cadherin controls adherens junctions in the epidermis and the renewal of hair follicles. *EMBO J.* **22**, 5723-5733.
